# Supplementary material
Source: Springer Nature journal article supplement (https://www.springermedizin.de/resource/supplementary/12877_2012_816_MOESM1_ESM.pdf/9440478)

## Factors

- Proximal factor
  - Pain
- Background factors
  - Cognitive impairment
  - ADL impairment
  - Age
  - Sex

## Disruptive Behaviors

- Wandering
- Aggression
- Agitation

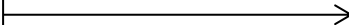

Supplement: MOESM1 [file 9440478]
